# Supplementary material for: Association between dietary fiber intake and atherosclerotic cardiovascular disease risk in adults: a cross-sectional study of 14,947 population based on the National Health and Nutrition Examination Surveys
Source: Springer Nature journal article supplement (doi:10.1186/s12889-022-13419-y), 2022-05-31
Supplement: MOESM1 [file 23112550]

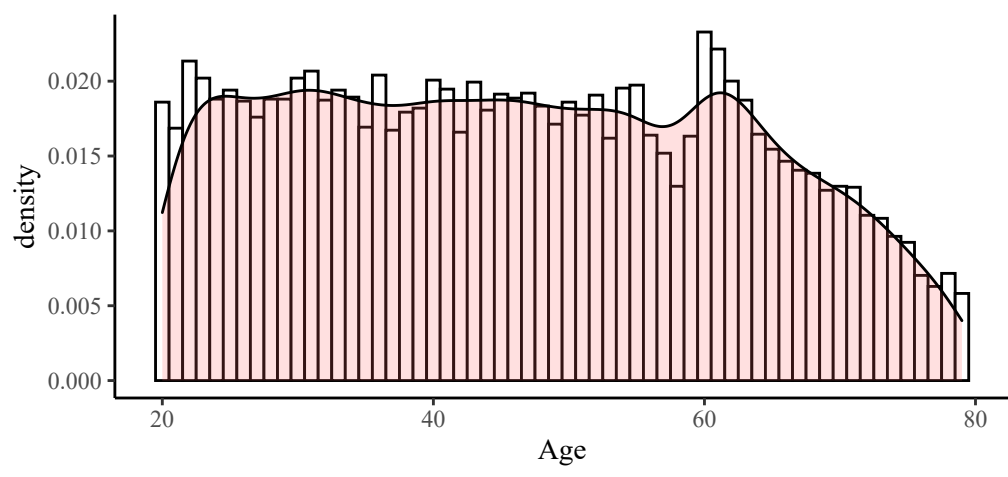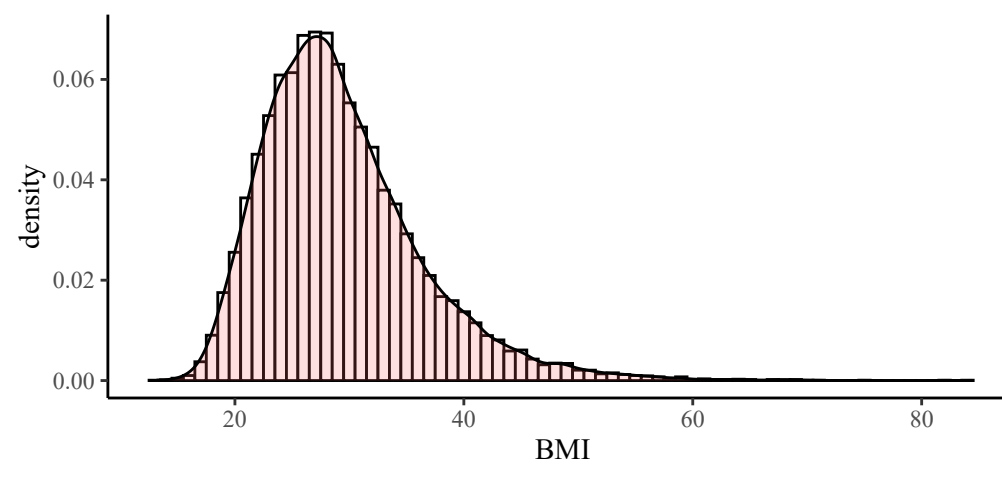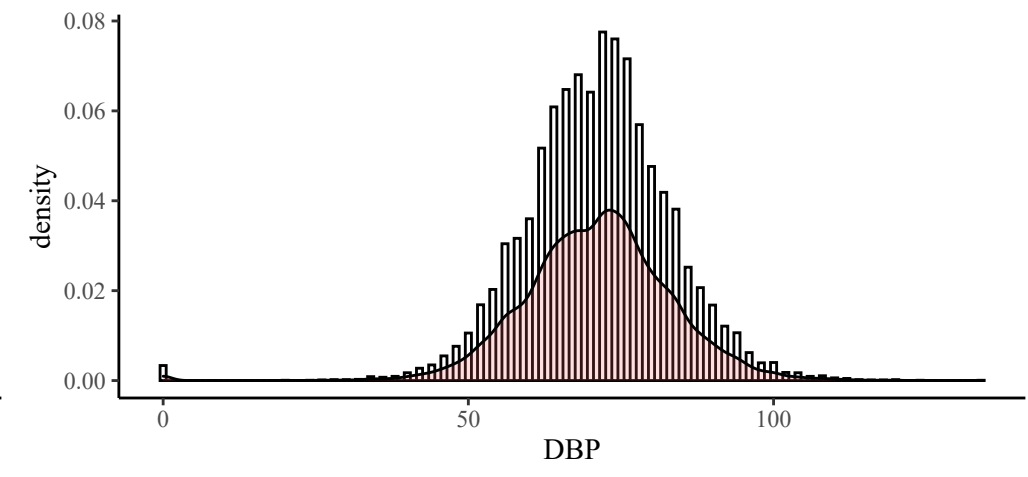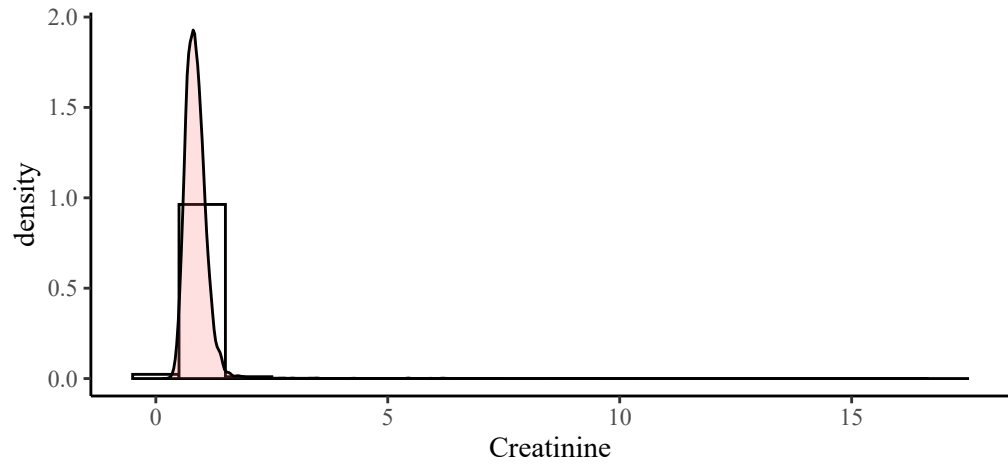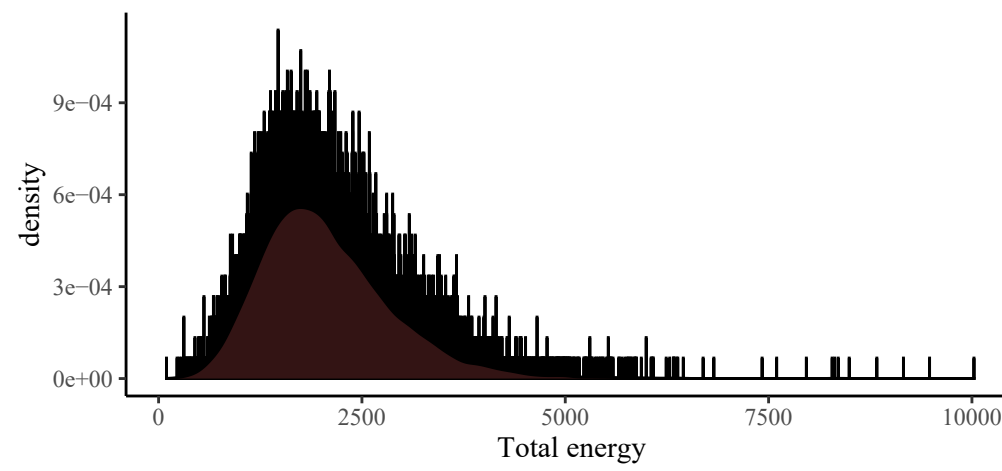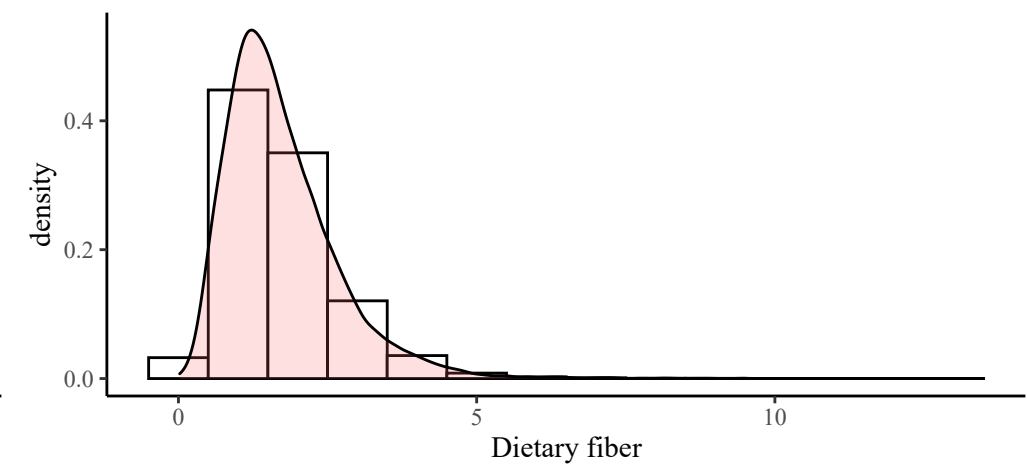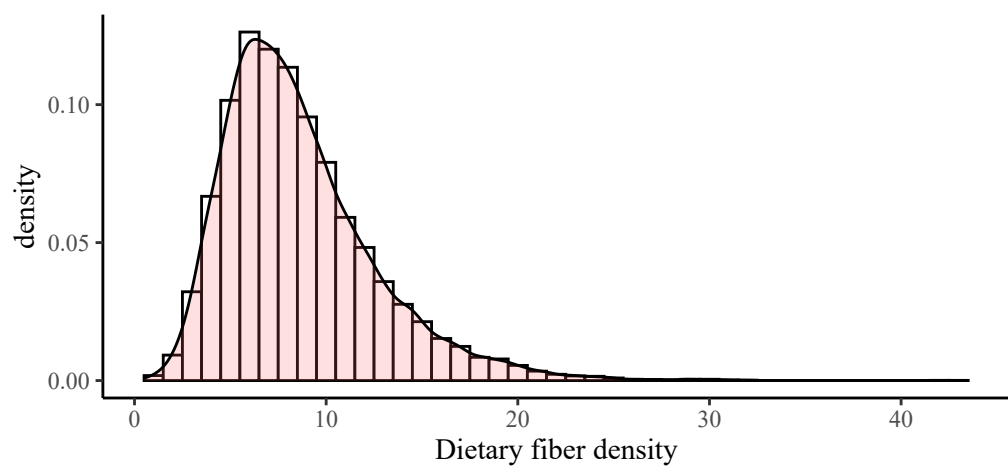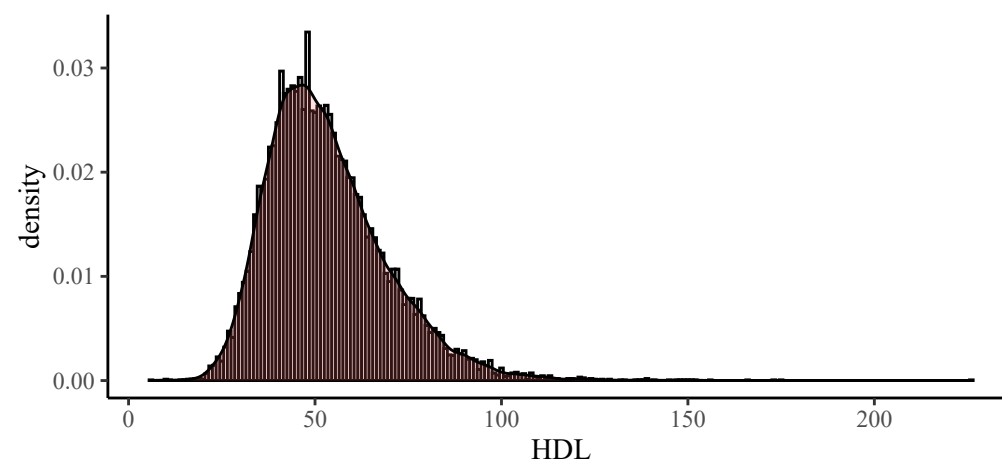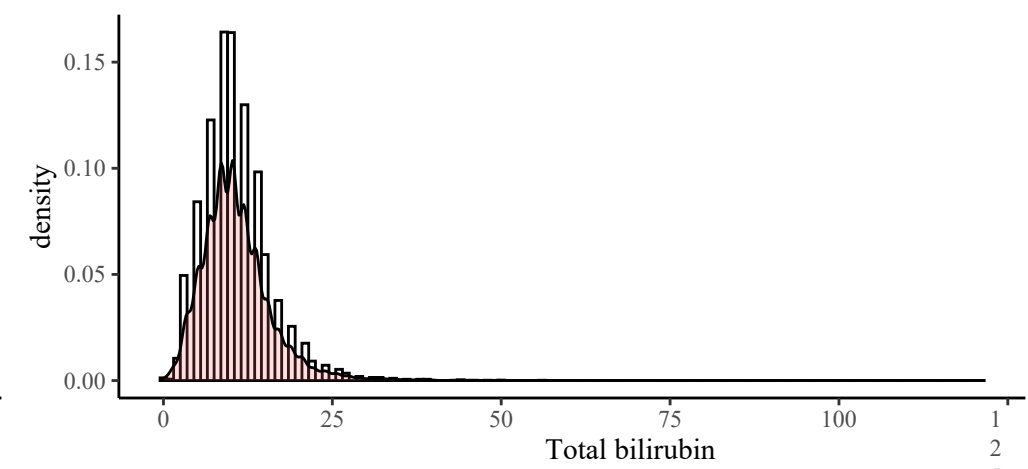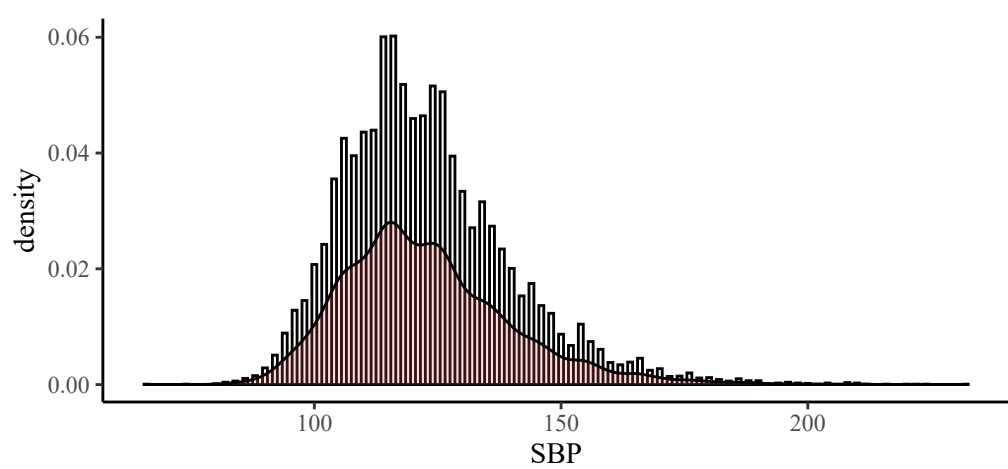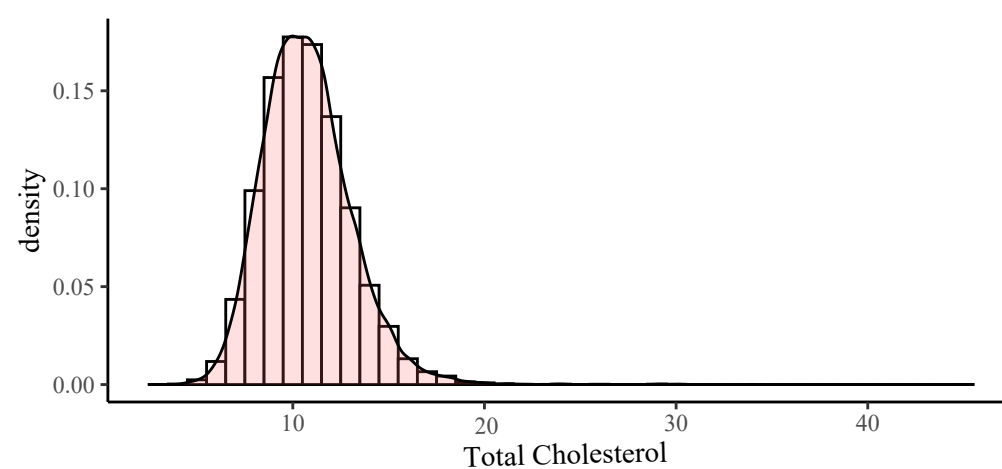

The normality tests for continuous variables.
